# Supplementary material for: Preparation of protic ionic liquids with minimal water content and 15N NMR study of proton transfer
Source: Royal Society of Chemistry journal article supplement (doi:10.1039/b921432a), 2010-01-01
Supplement: b921432a.pdf [file b921432a.pdf]

Preparation of protic ionic liquids with minimal  
water content and  $^{15}\text{N}$  NMR study of proton  
transfer.

**Supplementary information**

Geoffrey L. Burrell\*   Iko M. Burgar<sup>†</sup>   Frances Separovic<sup>‡</sup>  
Noel F. Dunlop<sup>§</sup>

November 23, 2009

---

\*School of Chemistry, The University of Melbourne, Melbourne, VIC 3010, Australia

<sup>†</sup>CSIRO Materials Science & Engineering, Clayton, VIC 3169, Australia

<sup>‡</sup>School of Chemistry, The University of Melbourne, Melbourne, VIC 3010, Australia, E-mail:  
fs@unimelb.edu.au

<sup>§</sup>Orica Ltd., Melbourne, VIC 3002, Australia

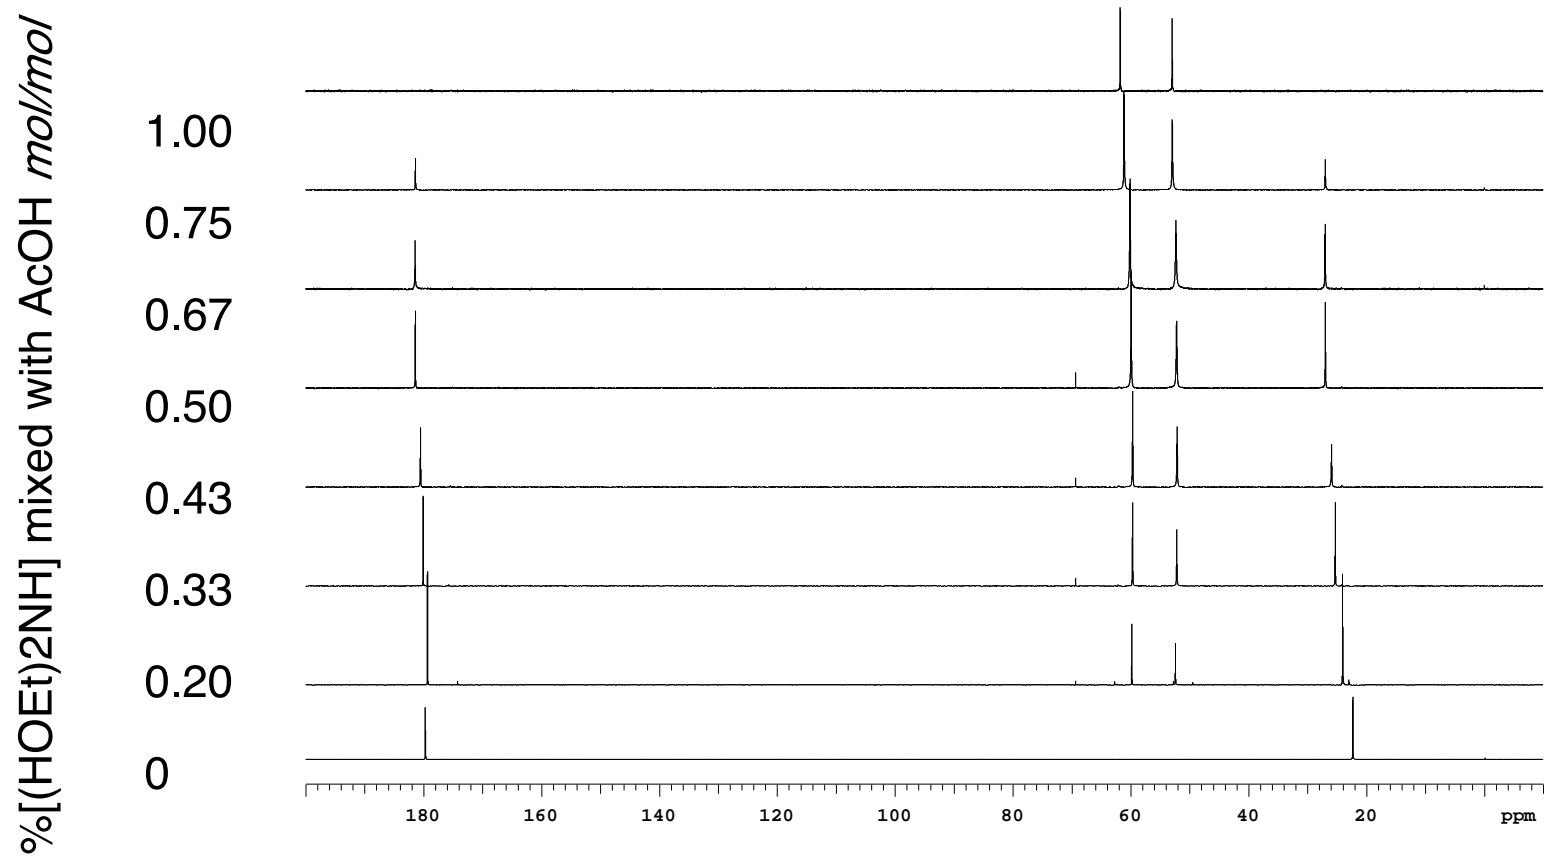

Figure 1:  $^{13}\text{C}$  NMR of  $(\text{HOEt})_2\text{NH} \cdot \text{AcOH}$  - full spectrum.

3

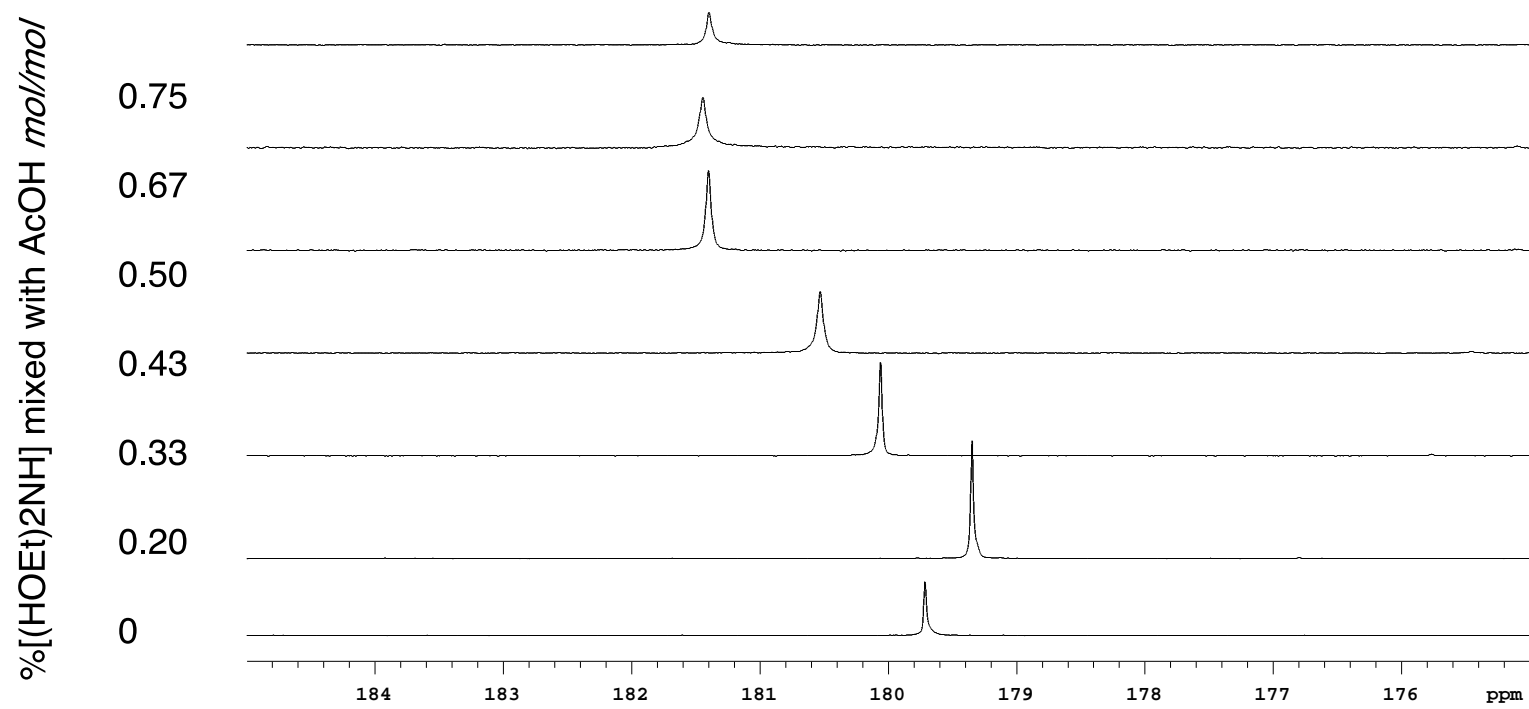

Figure 2:  $^{13}\text{C}$  NMR of  $(\text{HOEt})_2\text{NH}\cdot\text{AcOH}$  - carboxylic acid carbon.

4

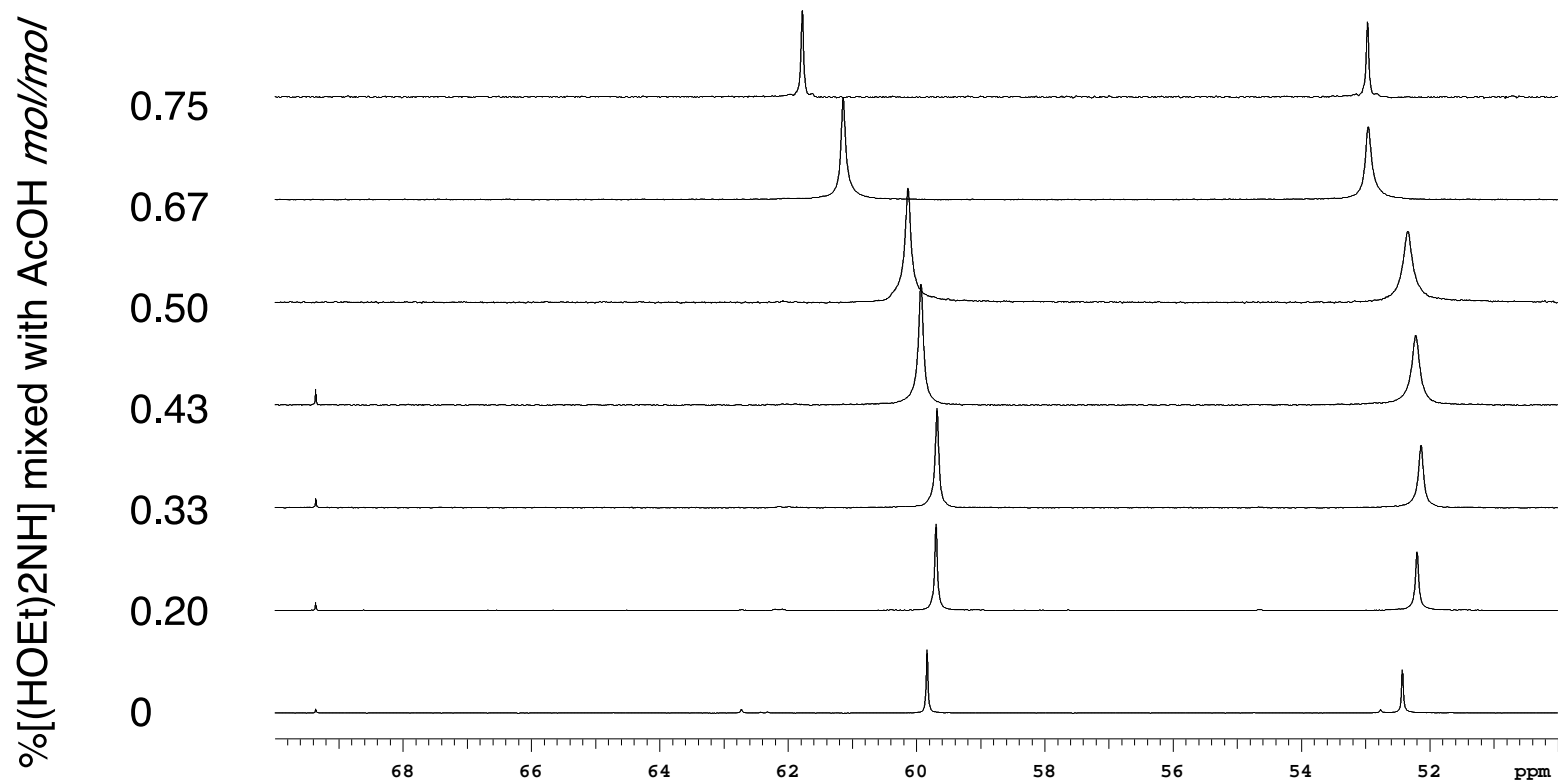

Figure 3:  $^{13}\text{C}$  NMR of  $(\text{HOEt})_2\text{NH} \cdot \text{AcOH}$  -  $(\text{HOEt})_2\text{NH}$  ethyl chain,  $-\text{CH}_2\text{N}$  ~60 ppm,  $\text{OCH}_2-$  ~52 ppm.

S

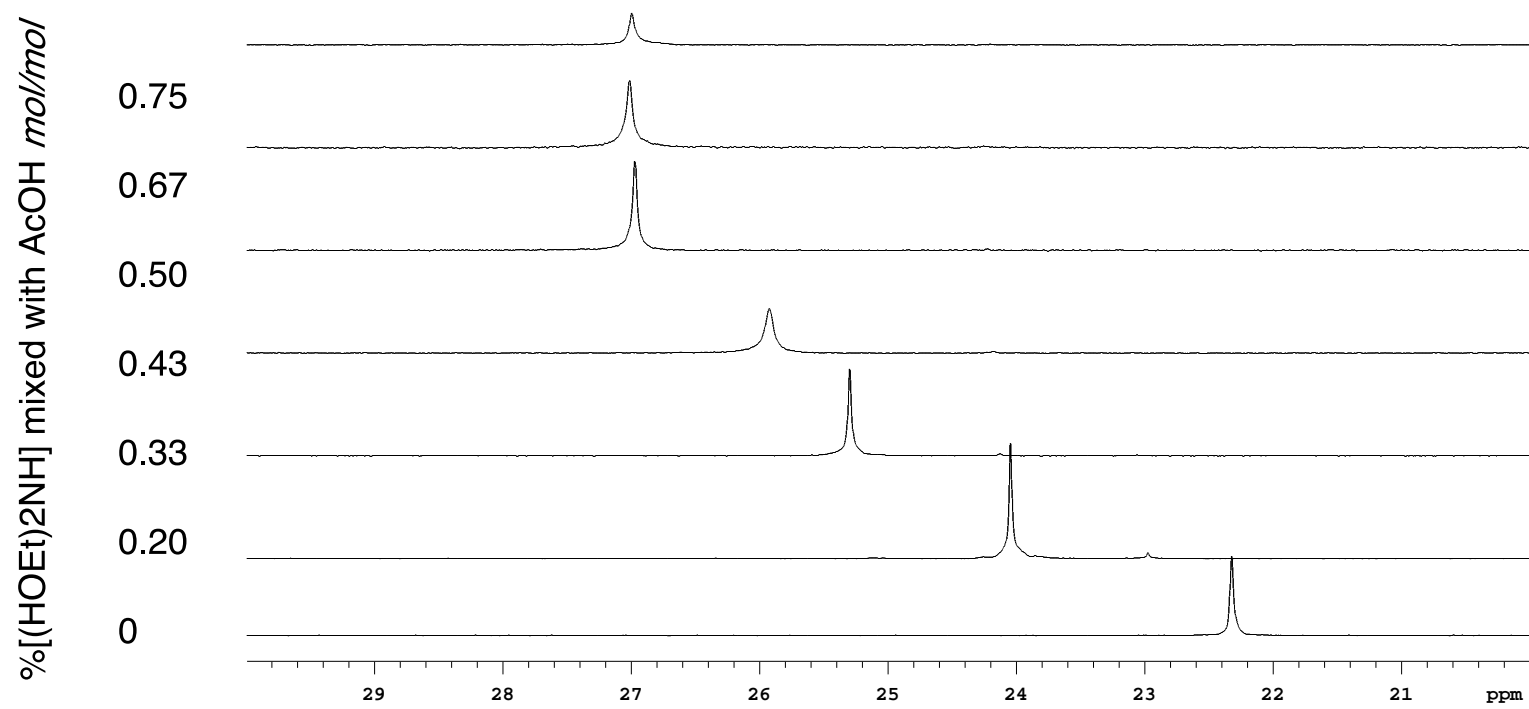

Figure 4:  $^{13}\text{C}$  NMR of  $(\text{HOEt})_2\text{NH} \cdot \text{AcOH}$  - AcOH methyl group.
